# Supplementary material
Source: MDPI journal article supplement (https://www.mdpi.com/2076-3417/14/9/3683)

## Supplementary data

Figure S1.  $^1\text{H}$  NMR spectrum of MSP-RT extract containing 4- $\alpha$ -rhamnopyranosyloxy-benzyl glucosinolate

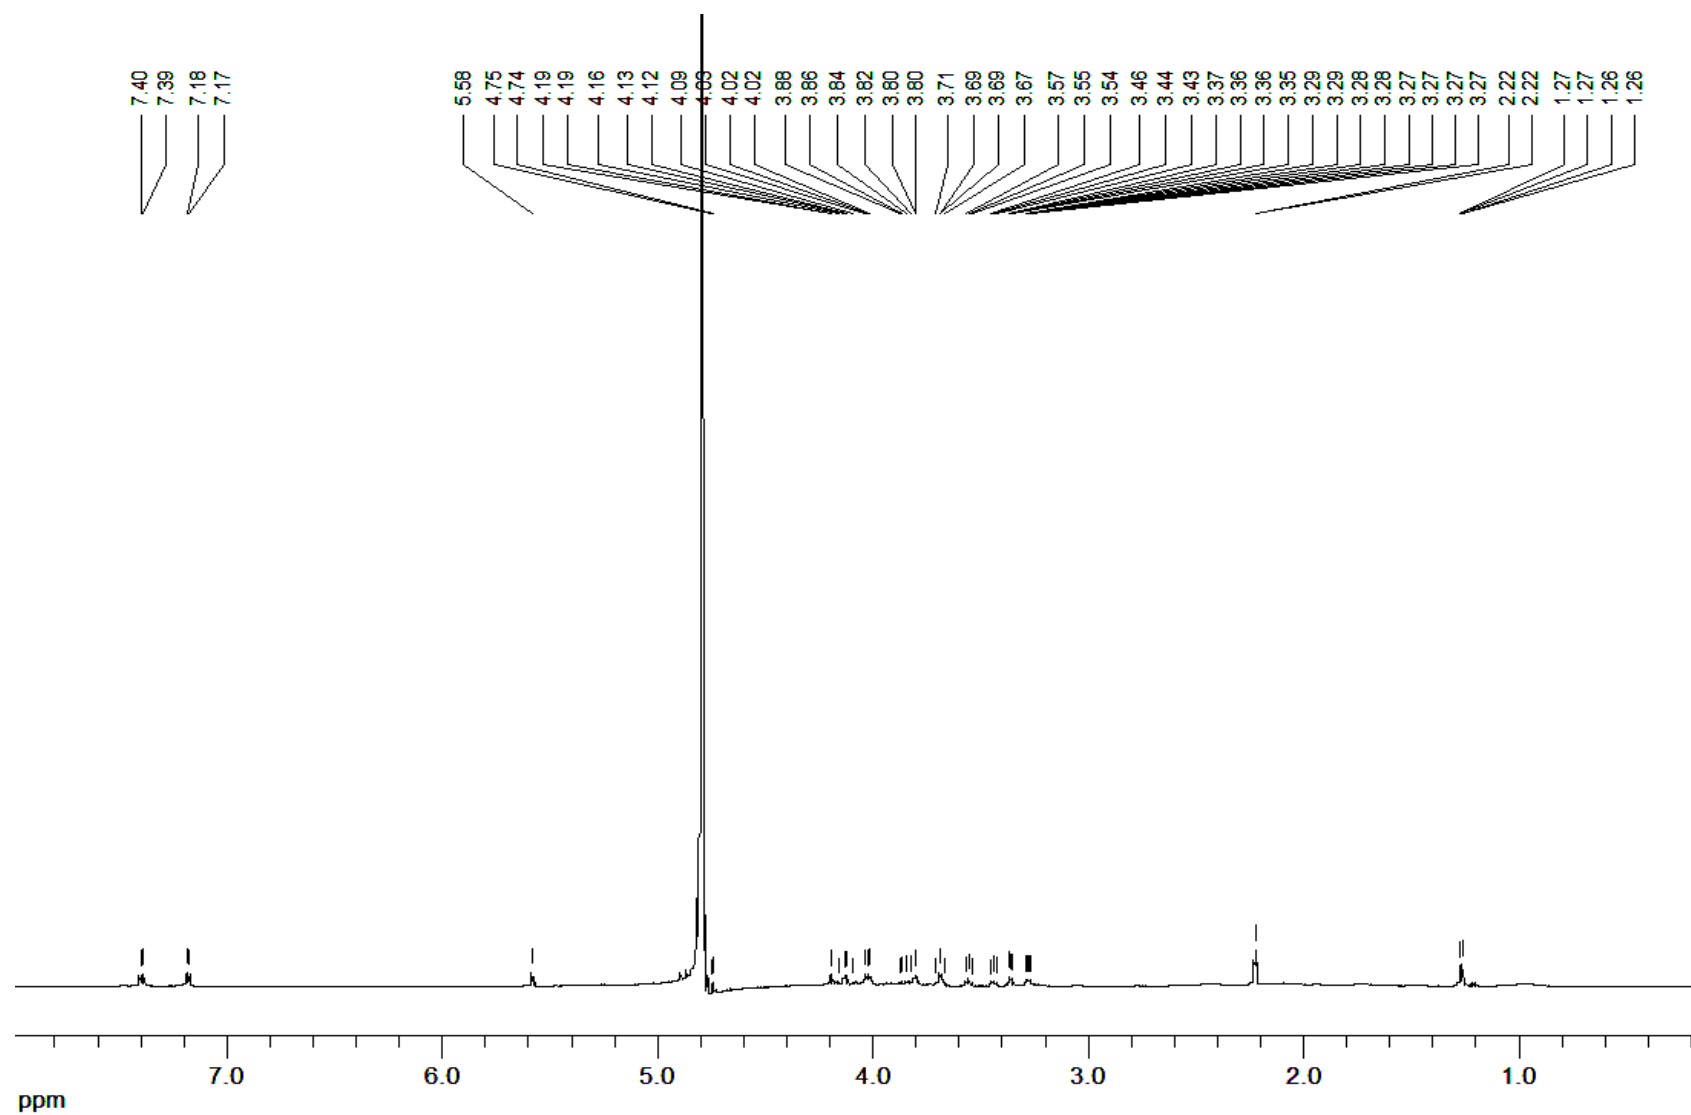

The fragment of the MSP-RT spectrum in aromatic range

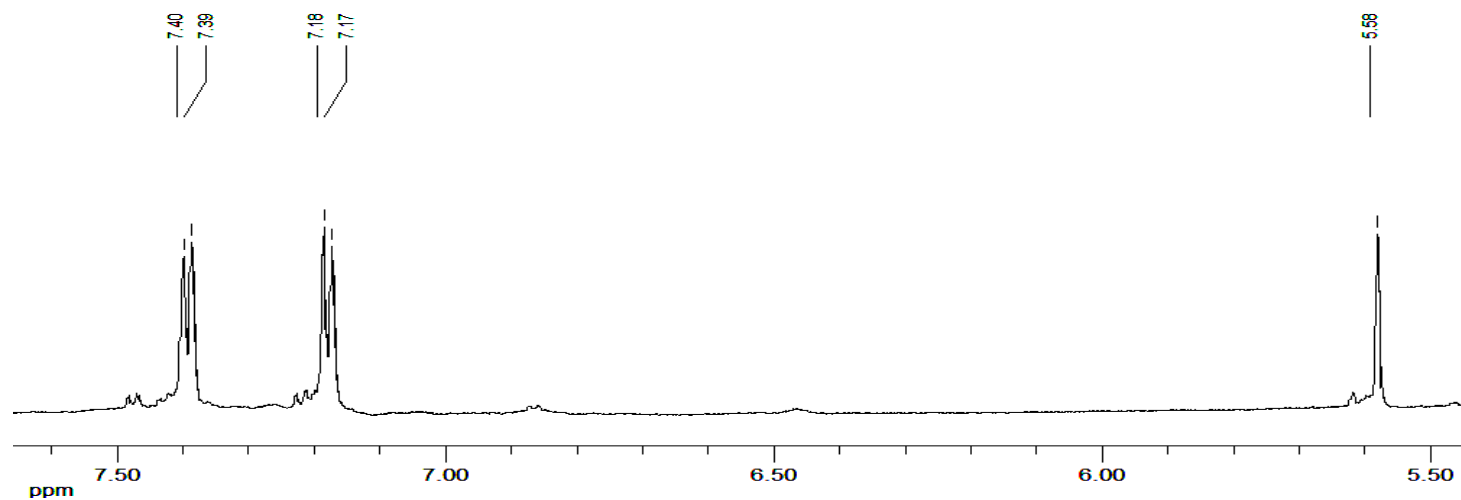

The fragment of the MSP-RT spectrum in the aliphatic range

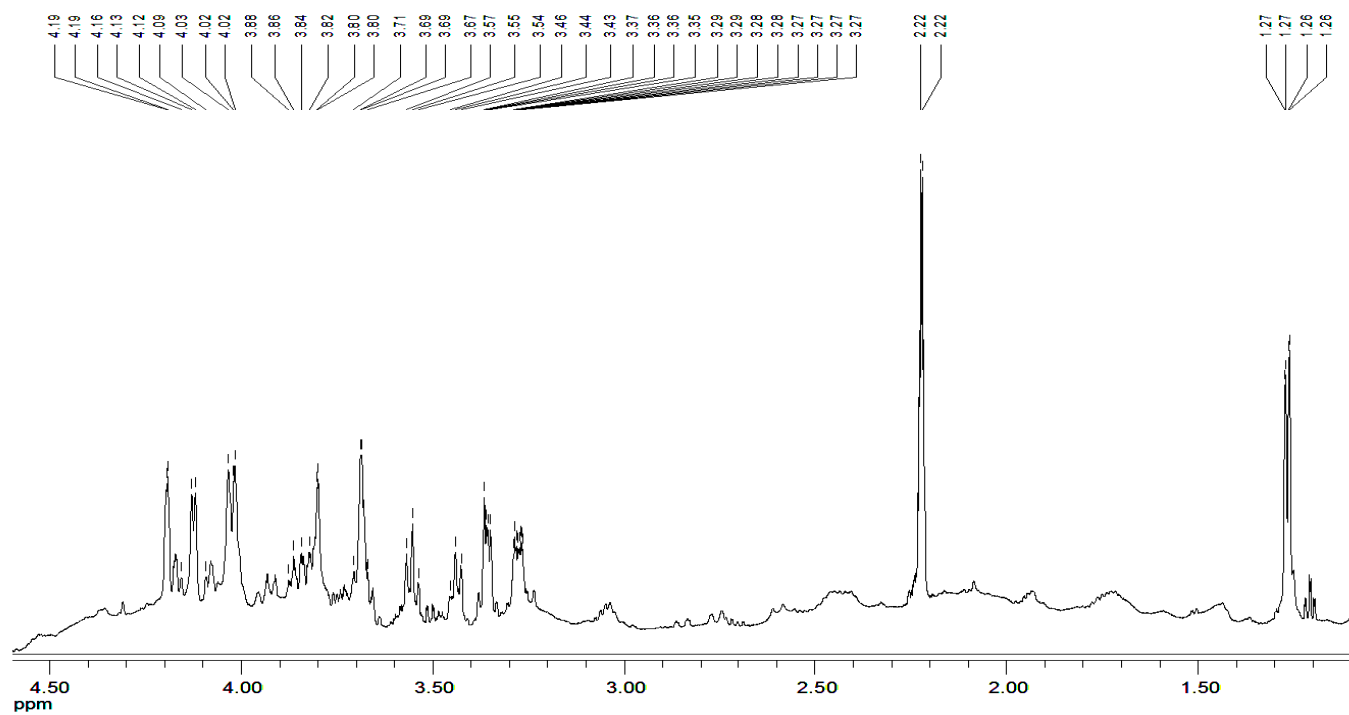

Figure S2.  $^{13}\text{C}$  NMR spectrum of MSP-RT extract containing 4- $\alpha$ -rhamnopyranosyloxy-benzyl glucosinolate

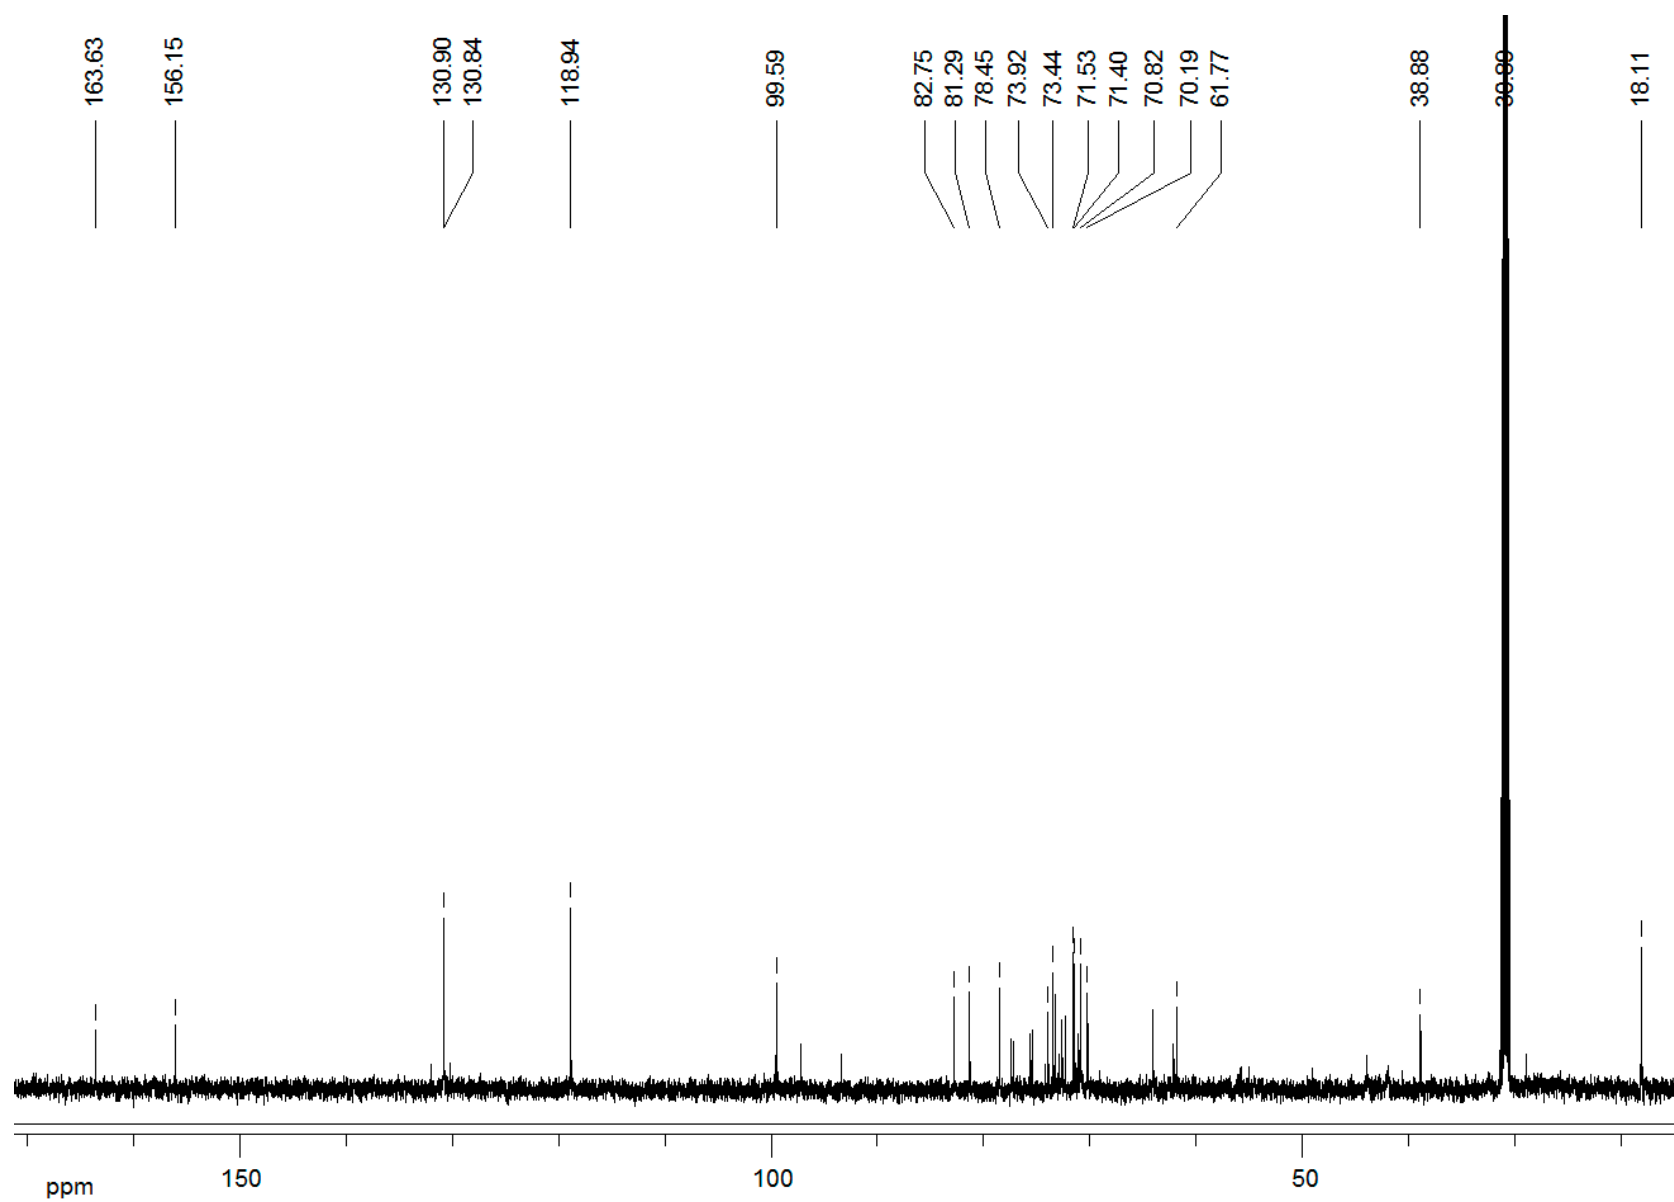

$^1\text{H}$  NMR ( $\delta_{\text{H}}$ [ppm], 600 MHz,  $\text{D}_2\text{O}$ , 25  $^\circ\text{C}$ ) phenyl ring: 7.40 (2 H, d,  $J$  7.0 Hz, 9-H), 7.18 (2 H, d,  $J$  7.0 Hz, 8-H); pyranose ring: 5.58 (1 H, bs, 2-H), 4.19 (1 H, d,  $J$  9.6 Hz, 3-H), 4.03 (1 H, dd,  $J$  9.6 Hz,  $J$  9.6 Hz, 4-H), 3.84 (1 H, qd, 6-H), 3.55 (1 H, t,  $J$  9.6 Hz, 5-H); 4.13 (1 H, d (spin system AB),  $J$  -16.5 Hz, 11-H), 4.11 (1 H, d (spin system AB),  $J$  -16.5 Hz, 11'-H), 1.27 (3 H, d,  $J$  7.2 Hz,  $\text{CH}_3$ ); tiopyranose ring: 4.74 (1H, d 7.0 Hz, 2'-H); 3.80 (1H, dd 9.8 Hz,  $J$  7.0 Hz, 3'-H); 3.69 (2H, diastereotopic spin system AB)  $J$  -12.0 Hz,  $J$  6.8 Hz 7'-H); 3.44 (1H, t,  $J$  9.5 Hz, 5'-H); 3.37 (1H, dd,  $J$  9.8 Hz,  $J$  9.5 Hz, 4'-H); 3.28 (1H, qd, 6'-H).

$^{13}\text{C}$  NMR, ( $\delta_{\text{C}}$  [ppm], 150 MHz,  $\text{D}_2\text{O}$  (acetone  $\text{D}_6$ ), 25  $^\circ\text{C}$ ) 163.63, 156.15, 130.90, 130.84, 118.94, 99.59, 82.75, 81.29, 78.46, 73.92, 73.44, 71.53, 71.40, 70.82, 70.19, 61.77, 38.88, 18.11.

**Figure S3.** Mass spectrum containing molecular peak  $m/z$  570.0203 confirming the structure in MSP-RT extract

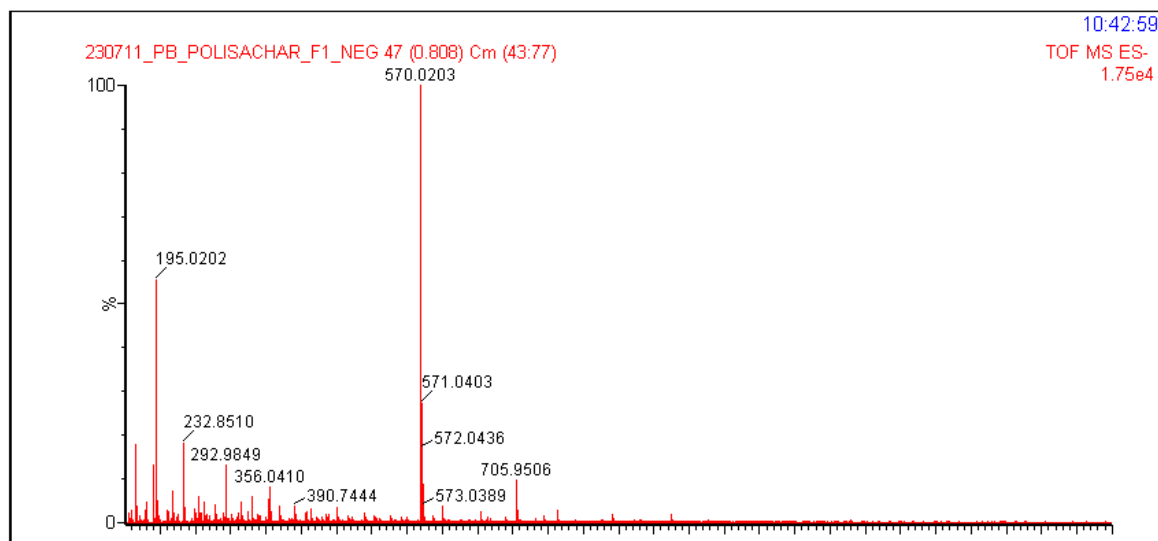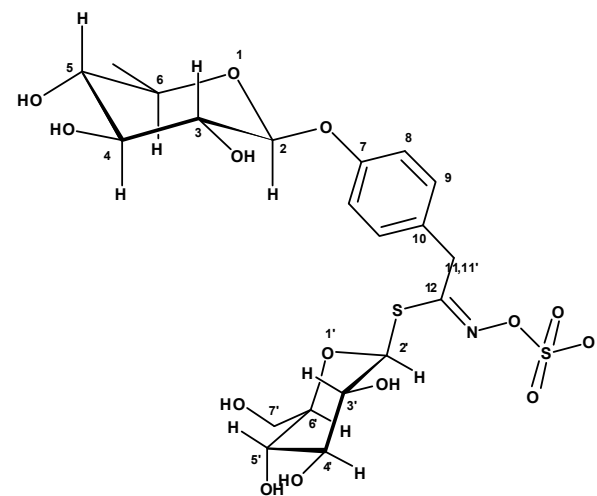

Supplement: s1 [file s1]
